# Supplementary material for: The Competitive Car Production Game: Teaching Theory of Constraints and Linear Programming
Source: Atypon-hosted journal article supplement (doi:10.1287/ited.2024.0125), 2025-06-16
Supplement: ited.2024.0125.sm2.xlsx [file ited.2024.0125.sm2.xlsx]

## Sheet: LP Module 1 
		Blue car	Green car	Pink car	Yellow car
	Margin	15	30	20	25
Processing times	ti1	1	2	1	3
	ti2	2	1	3	1
	ti3	2	4	2	2
	ti4	2	3	2	2
	ti5	1	3	1	1
	Demand	4	7	6	5
						T	40
Optimal production quantities		Blue car	Green car	Pink car	Yellow car	LEFT HAND SIDE		RIGHT HAND SIDE
		0	4.5	6	5		SIGN
Capacity constraints: total processing time on Workstation WSj	WS1					30	<=	40
	WS2					27.5	<=	40
	WS3					40	<=	40
	WS4					35.5	<=	40
	WS5					24.5	<=	40
						Left hand side: total processing time on a WS required to produce the optimal quantities
	Optimal profit	380				Right hand side: maximum available production time, T
	MULTIPLE OPTIMAL SOLUTIONS
		Blue car	Green car	Pink car	Yellow car
	Solution 1	3	3	6	5
	Solution 2	1	4	6	5

## Sheet: Linear IP Module 1
		Blue car	Green car	Pink car	Yellow car
	Margin	15	30	20	25
Processing times	ti1	1	2	1	3
	ti2	2	1	3	1
	ti3	2	4	2	2
	ti4	2	3	2	2
	ti5	1	3	1	1
	Demand	4	7	6	5
						T	40
Optimal production quantities		Blue car	Green car	Pink car	Yellow car	LEFT HAND SIDE		RIGHT HAND SIDE
		1	4	6	5		SIGN
Capacity constraints: total processing time on Workstation WSj	WS1					30	<=	40
	WS2					29	<=	40
	WS3					40	<=	40
	WS4					36	<=	40
	WS5					24	<=	40
						Left hand side: total processing time on a WS required to produce the optimal quantities
	Optimal profit	380				Right hand side: maximum available production time, T
	MULTIPLE OPTIMAL SOLUTIONS
		Blue car	Green car	Pink car	Yellow car
	Solution 1	3	3	6	5
	Solution 2	1	4	6	5

## Sheet: Sensitivity LP Report 1
Microsoft Excel 16.0 Sensitivity Report
Worksheet: [Solutions new.xlsx]LP Module 1
Report Created: 14/03/2025 13:54:57
Variable Cells
			Final	Reduced	Objective	Allowable	Allowable
	Cell	Name	Value	Cost	Coefficient	Increase	Decrease
	$C$13	Blue car	0	0	15	0	1e+30
	$D$13	Green car	4.5	0	30	10	0
	$E$13	Pink car	6	5	20	1e+30	5
	$F$13	Yellow car	5	10	25	1e+30	10
Constraints
			Final	Shadow	Constraint	Allowable	Allowable
	Cell	Name	Value	Price	R.H. Side	Increase	Decrease
	$G$14	WS1 LEFT HAND SIDE	30	0	40	1e+30	10
	$G$15	WS2 LEFT HAND SIDE	27.5	0	40	1e+30	12.5
	$G$16	WS3 LEFT HAND SIDE	40	7.5	40	6	18
	$G$17	WS4 LEFT HAND SIDE	35.5	0	40	1e+30	4.5
	$G$18	WS5 LEFT HAND SIDE	24.5	0	40	1e+30	15.5

## Sheet: TOC Module 1
			Blue car	Green car	Pink car	Yellow car
		Margin	15	30	20	25
	Processing times	ti1	1	2	1	3
		ti2	2	1	3	1
		ti3	2	4	2	2
		ti4	2	3	2	2
		ti5	1	3	1	1
		Demand	4	7	6	5
						T	40
			Blue car	Green car	Pink car	Yellow car	total time
	Capacity constraints: total processing time on Workstation WSj	WS1	4	14	6	15	39	<=	40
		WS2	8	7	18	5	38	<=	40
		WS3	8	28	12	10	58	<=	40	BOTTLENECK
		WS4	8	21	12	10	51	<=	40
		WS5	4	21	6	5	36	<=	40
			Blue car	Green car	Pink car	Yellow car
	Unit margin per hour on the bottleneck		7.5	7.5	10	12.5
	TOC solutions		1	4	6	5	total time
	The total time on the bottleneck WS3		2	16	12	10	40
		Profit	380

## Sheet: Gantt Charts
	a) The Gantt chart for 2 consecutive games of 40 rounds
		1	2	3	4	5	6	7	8	9	10	11	12	13	14	15	16	17	18	19	20	21	22	23	24	25	26	27	28	29	30	31	32	33	34	35	36	37	38	39	40
	M1
	M2
	M3
	M4
	M5
		41	42	43	44	45	46	47	48	49	50	51	52	53	54	55	56	57	58	59	60	61	62	63	64	65	66	67	68	69	70	71	72	73	74	75	76	77	78	79	80
	M1
	M2
	M3
	M4
	M5
	b) The Gantt chart with the optimal schedule for a single game
		1	2	3	4	5	6	7	8	9	10	11	12	13	14	15	16	17	18	19	20	21	22	23	24	25	26	27	28	29	30	31	32	33	34	35	36	37	38	39	40
	M1
	M2
	M3	1		2
	M4
	M5		3
		Note:
			1 - a green piece to be placed on the third square of WS3
			2 - a green piece to be placed in the inventory between WS2 & WS3
			3 - a green piece to be placed in the inventory between WS4 & WS5

## Sheet: Option 1
		Blue car	Green car	Pink car	Yellow car
	Margin	15	30	20	25
Processing times	ti1	1	2	1	3
	ti2	2	1	3	1
	ti3	1	4	1	2
	ti4	1	3	1	2
	ti5	1	3	1	1
	Demand	4	7	6	5
						T	40
Optimal production quantities		Blue car	Green car	Pink car	Yellow car	LEFT HAND SIDE		RIGHT HAND SIDE
		4	5	6	5		SIGN
Capacity constraints: total processing time on Workstation WSj	WS1					35	<=	40
	WS2					36	<=	40
	WS3					40	<=	40
	WS4					35	<=	40
	WS5					30	<=	40
	Optimal profit	455
TOC:
		Blue car	Green car	Pink car	Yellow car	total time
Capacity constraints: total processing time on Workstation WSj	WS1	4	14	6	15	39
	WS2	8	7	18	5	38
	WS3	4	28	6	10	48	the bottleneck
	WS4	4	21	6	10	41
	WS5	4	21	6	5	36
		Blue car	Green car	Pink car	Yellow car
Unit margin per hour on the bottleneck		15	7.5	20	12.5
TOC solutions		4	5	6	5	total time
The total time on the bottleneck WS3		4	20	6	10	40

## Sheet: Option 2
		Blue car	Green car	Pink car	Yellow car
	Margin	15	30	20	25
Processing times	ti1	1	2	1	3
	ti2	2	1	3	1
	ti3	2	2	2	2
	ti4	2	3	2	1
	ti5	1	3	1	1
	Demand	4	7	6	5
						T	40
Optimal production quantities		Blue car	Green car	Pink car	Yellow car	LEFT HAND SIDE		RIGHT HAND SIDE
		1	7	6	5		SIGN
Capacity constraints: total processing time on Workstation WSj	WS1					36	<=	40
	WS2					32	<=	40
	WS3					38	<=	40
	WS4					40	<=	40
	WS5					33	<=	40
	Optimal profit	470
TOC:
		Blue car	Green car	Pink car	Yellow car	total time
Capacity constraints: total processing time on Workstation WSj	WS1	4	14	6	15	39
	WS2	8	7	18	5	38
	WS3	8	14	12	10	44
	WS4	8	21	12	5	46	the bottleneck
	WS5	4	21	6	5	36
		Blue car	Green car	Pink car	Yellow car
Unit margin per hour on the bottleneck		7.5	10	10	25
TOC solutions		1	7	6	5	total time
The total time on the bottleneck WS3		2	21	12	5	40

## Sheet: Option 3
		Blue car	Green car	Pink car	Yellow car
	Margin	15	30	20	25
Processing times	ti1	1	2	1	3
	ti2	2	1	3	1
	ti3	1	4	2	1
	ti4	1	3	2	1
	ti5	1	3	1	1
	Demand	4	7	6	5
						T	40
Optimal production quantities		Blue car	Green car	Pink car	Yellow car	LEFT HAND SIDE		RIGHT HAND SIDE
		3	5	6	5		SIGN
Capacity constraints: total processing time on Workstation WSj	WS1					34	<=	40
	WS2					34	<=	40
	WS3					40	<=	40
	WS4					35	<=	40
	WS5					29	<=	40
	Optimal profit	440
TOC:
		Blue car	Green car	Pink car	Yellow car	total time
Capacity constraints: total processing time on Workstation WSj	WS1	4	14	6	15	39
	WS2	8	7	18	5	38
	WS3	4	28	12	5	49	the bottleneck
	WS4	4	21	12	5	42
	WS5	4	21	6	5	36
		Blue car	Green car	Pink car	Yellow car
Unit margin per hour on the bottleneck		15	7.5	10	25
TOC solutions		3	5	6	5	total time
The total time on the bottleneck WS3		3	20	12	5	40

## Sheet: Option 4
		Blue car	Green car	Pink car	Yellow car
	Margin	15	30	20	25
Processing times	ti1	1	2	1	3
	ti2	2	1	3	1
	ti3	2	1	2	2
	ti4	1	3	2	2
	ti5	1	3	1	1
	Demand	4	7	6	5
						T	40
Optimal production quantities		Blue car	Green car	Pink car	Yellow car	LEFT HAND SIDE		RIGHT HAND SIDE
		4	6	4	5		SIGN
Capacity constraints: total processing time on Workstation WSj	WS1					35	<=	40
	WS2					31	<=	40
	WS3					32	<=	40
	WS4					40	<=	40
	WS5					31	<=	40
	Optimal profit	445
TOC:
		Blue car	Green car	Pink car	Yellow car	total time
Capacity constraints: total processing time on Workstation WSj	WS1	4	14	6	15	39
	WS2	8	7	18	5	38
	WS3	8	7	12	10	37
	WS4	4	21	12	10	47	the bottleneck
	WS5	4	21	6	5	36
		Blue car	Green car	Pink car	Yellow car
Unit margin per hour on the bottleneck		15	10	10	12.5
TOC solutions		4	6	4	5	total time
The total time on the bottleneck WS3		4	18	8	10	40

## Sheet: Option 5
		Blue car	Green car	Pink car	Yellow car
	Margin	15	30	20	25
Processing times	ti1	1	2	1	3
	ti2	2	1	3	1
	ti3	1	2	1	1
	ti4	2	3	2	2
	ti5	1	3	1	1
	Demand	4	7	6	5
						T	40
Optimal production quantities		Blue car	Green car	Pink car	Yellow car	LEFT HAND SIDE		RIGHT HAND SIDE
		0	6	6	5		SIGN
Capacity constraints: total processing time on Workstation WSj	WS1					33	<=	40
	WS2					29	<=	40
	WS3					23	<=	40
	WS4					40	<=	40
	WS5					29	<=	40
	Optimal profit	425
TOC:
		Blue car	Green car	Pink car	Yellow car	total time
Capacity constraints: total processing time on Workstation WSj	WS1	4	14	6	15	39
	WS2	8	7	18	5	38
	WS3	4	14	6	5	29
	WS4	8	21	12	10	51	the bottleneck
	WS5	4	21	6	5	36
		Blue car	Green car	Pink car	Yellow car
Unit margin per hour on the bottleneck		7.5	10	10	12.5
TOC solutions		0	6	6	5	total time
The total time on the bottleneck WS3		0	18	12	10	40

[truncated: 3 more sheets: Option 6, Difference in Profits , Centralized model]
